# Supplementary material for: Metabolomics Analysis Reveals Novel Targets of Chemosensitizing Polyphenols and Omega-3 Polyunsaturated Fatty Acids in Triple Negative Breast Cancer Cells
Source: MDPI journal article supplement (doi:10.3390/ijms24054406), 2023-02-23
Supplement: s1 [file s1]

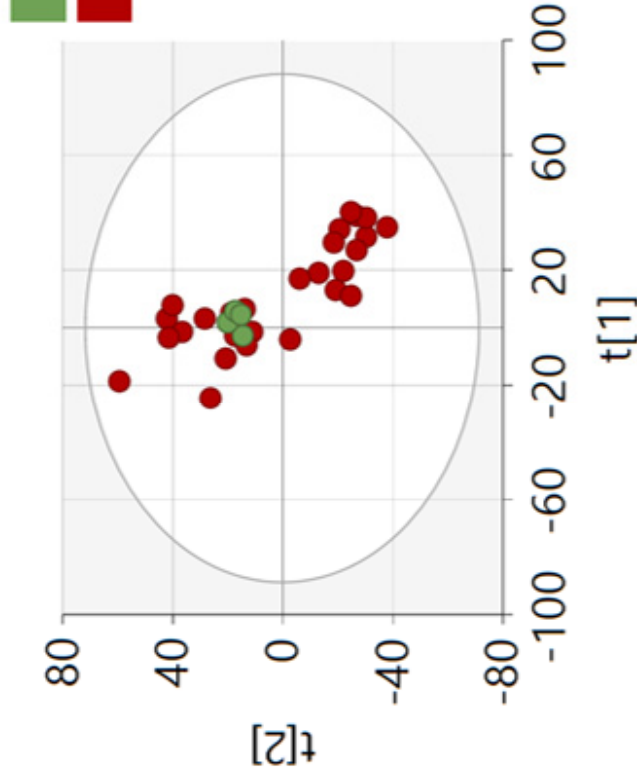

**Supplemental Figure S1.** PCA plot of study samples and quality control study pool (QCSP) replicates showing clustering and centering of QCSPs, indicating sufficient data quality.
